# Supplementary material
Source: MDPI journal article supplement (https://www.mdpi.com/2073-4344/13/11/1399)
Supplement: s1 [file s1]

## SUPPORTING INFORMATION

# $\beta$ -Mannosidase from *Cellulomonas fimi*: Immobilization Study and Application in the $\beta$ -Mannoside Synthesis

Marina S. Robescu <sup>1</sup>, Sara Tengattini <sup>1</sup>, Marco Rabuffetti <sup>2</sup>, Giovanna Speranza <sup>2</sup>, Marco Terreni <sup>1</sup>  
and Teodora Bavaro <sup>1,\*</sup>

<sup>1</sup> Department of Drug Sciences, University of Pavia, Viale Taramelli 12, I-27100 Pavia, Italy;  
marinasimona.robescu@unipv.it (M.S.R.); sara.tengattini@unipv.it (S.T.);  
marco.terreni@unipv.it (M.T.)

<sup>2</sup> Department of Chemistry, University of Milan, via Golgi 19, I-20133 Milano, Italy;  
marco.rabuffetti1@unimi.it (M.R.); giovanna.speranza@unimi.it (G.S.)

\* Correspondence: teodora.bavaro@unipv.it; Tel.: +39-0382-987265

## Table of contents

### Supplementary Figures

|                                                                                                                                              |    |
|----------------------------------------------------------------------------------------------------------------------------------------------|----|
| <b>Figure S1.</b> LC-MS chromatograms: acceptor screening                                                                                    | 1  |
| <b>Figure S2.</b> LC-MS monitoring transglycosylation in 100 mM maleate buffer pH 6.5                                                        | 2  |
| <b>Figure S3.</b> Co-solvents screening                                                                                                      | 3  |
| <b>Figure S4.</b> Transglycosylation reaction catalyzed by immobilized <i>Cf</i> - $\beta$ -Man (A) and soluble <i>Cf</i> - $\beta$ -Man (B) | 4  |
| <b>Figure S5.</b> ESI-MS spectrum of <b>4d</b>                                                                                               | 5  |
| <b>Figure S6.</b> $^1\text{H}$ NMR spectrum of <b>4d</b>                                                                                     | 6  |
| <b>Figure S7.</b> $^{13}\text{C}$ NMR spectrum of <b>4d</b>                                                                                  | 7  |
| <b>Figure S8.</b> COSY spectrum of <b>4d</b>                                                                                                 | 8  |
| <b>Figure S9.</b> TOCSY spectrum of <b>4d</b>                                                                                                | 9  |
| <b>Figure S10.</b> HPLC calibration curve of <b>4d</b>                                                                                       | 10 |

### Supplementary Schemes

|                                                                                                                                               |    |
|-----------------------------------------------------------------------------------------------------------------------------------------------|----|
| <b>Scheme S1.</b> Synthesis of cyanomethyl 1-thio- $\alpha$ -D-mannopyranoside ( <b>2b</b> ) and $\beta$ -D-N-acetylglucosamine ( <b>2d</b> ) | 13 |
|-----------------------------------------------------------------------------------------------------------------------------------------------|----|

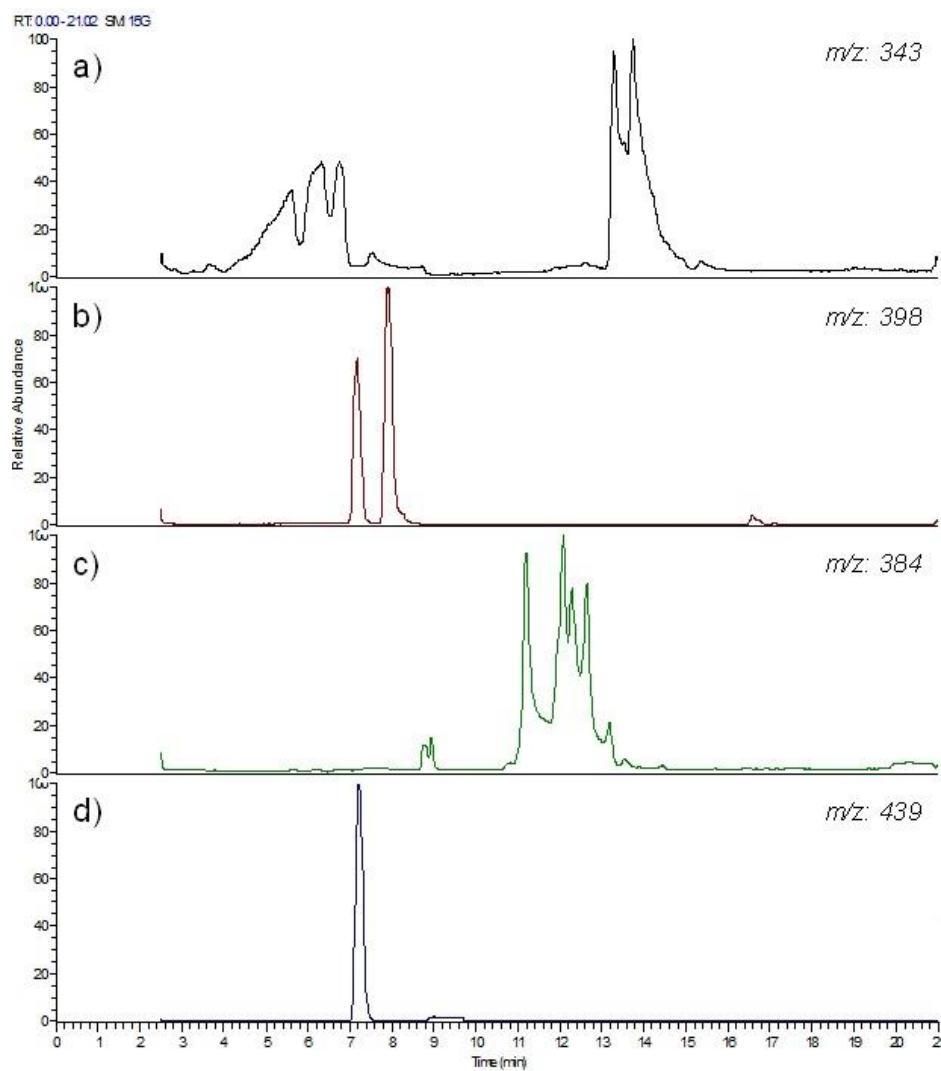

**Figure S1.** LC-MS extracted ion chromatograms: acceptor screening. a) D-mannose (**2a**), b) D-mannose-SCH<sub>2</sub>CN (**2b**), c) N-acetyl-D-glucosamine (**2c**), d) N-acetyl-D-glucosamine-SCH<sub>2</sub>CN (**2d**).

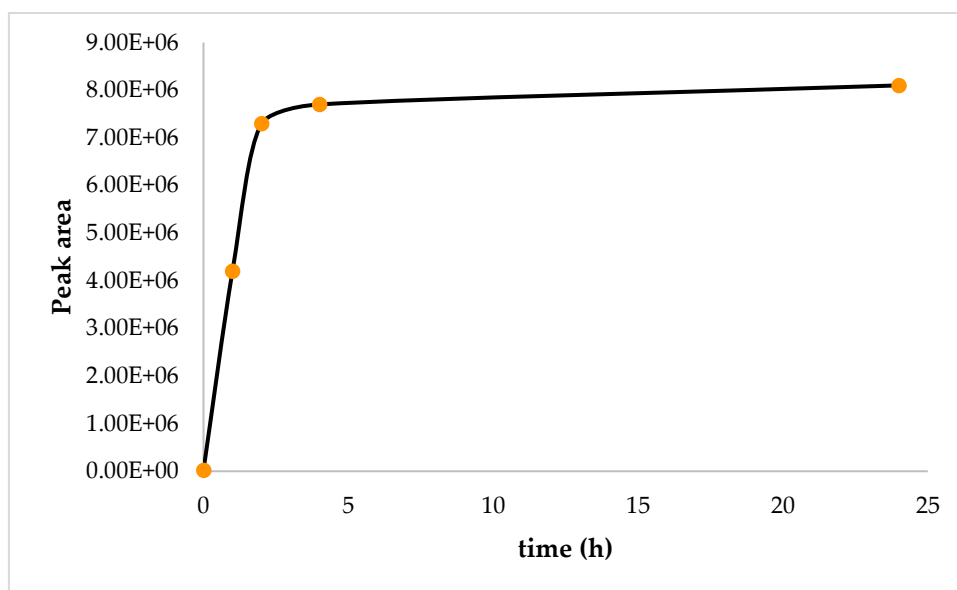

**Figure S2.** LC-MS monitoring of transglycosylation reaction in 100 mM maleate buffer pH 6.5.

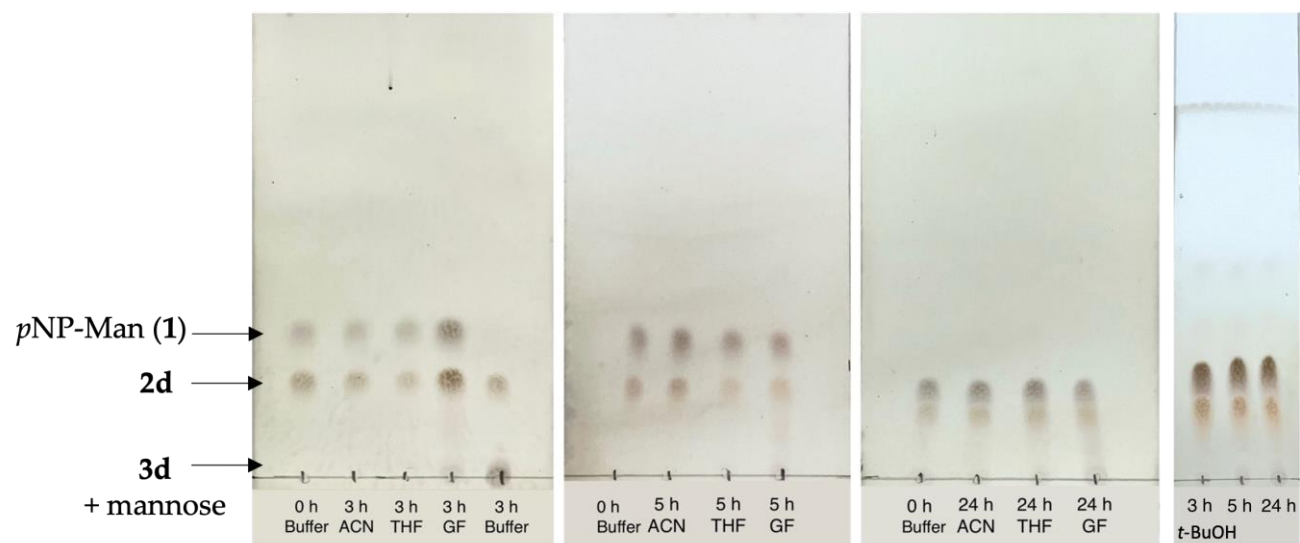

**Figure S3.** Co-solvents screening. TLC monitoring ( $\text{CHCl}_3/\text{MeOH}$ , 5:1).

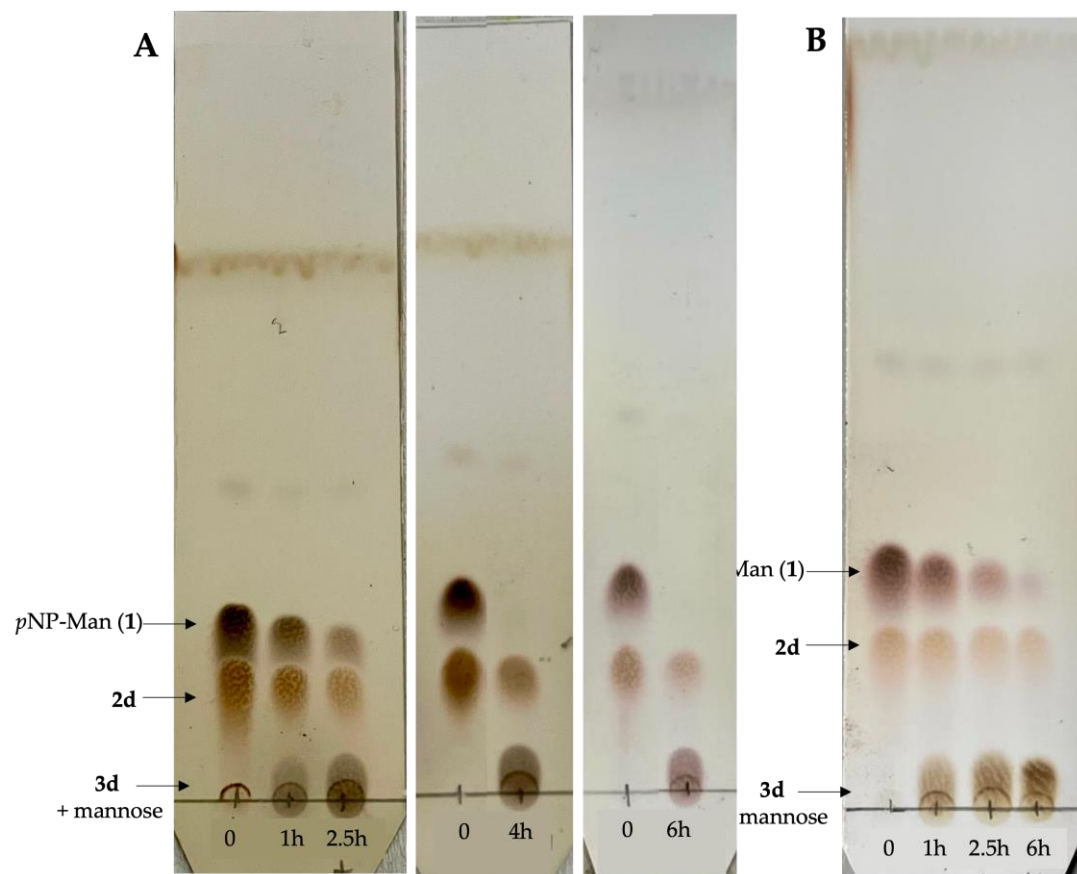

**Figure S4.** Transglycosylation reaction catalyzed by immobilized *Cf*- $\beta$ -Man (A) and soluble *Cf*- $\beta$ -Man (B). TLC monitoring ( $\text{CHCl}_3/\text{MeOH}$ , 5:1).

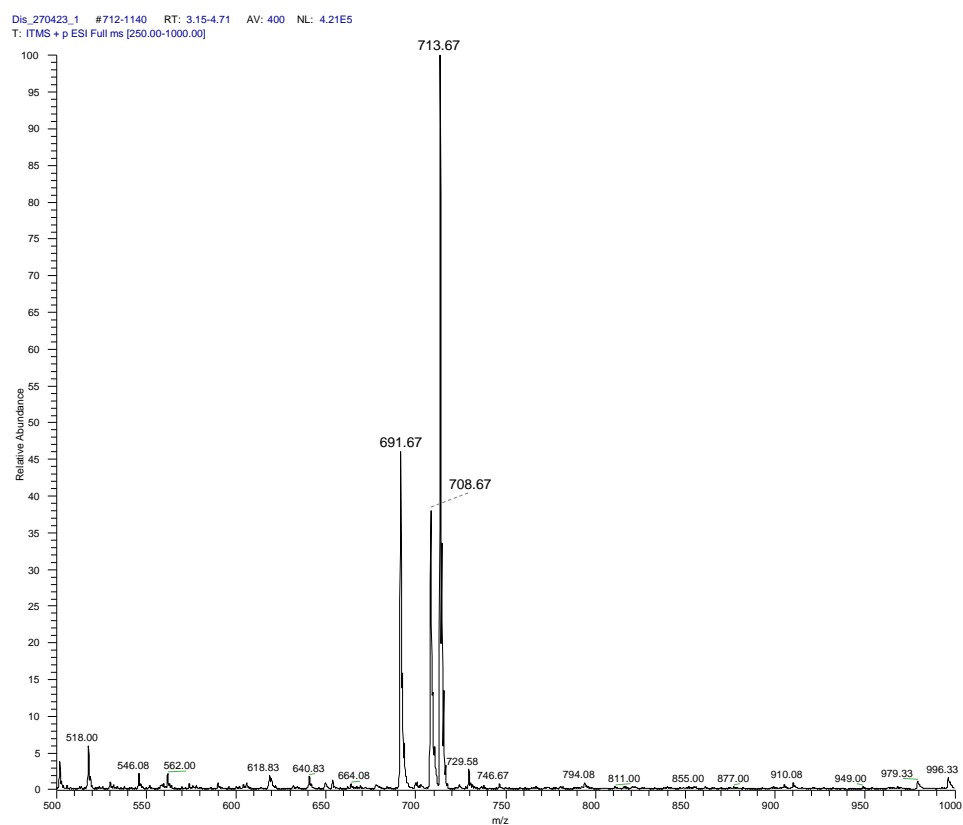

**Figure S5.** ESI-MS spectrum of **4d**.  $[M+H]^+ = 691.67\ m/z$ ;  $[M+NH_4]^+ = 708.67\ m/z$ ;  $[M+Na]^+ = 713.67\ m/z$ .

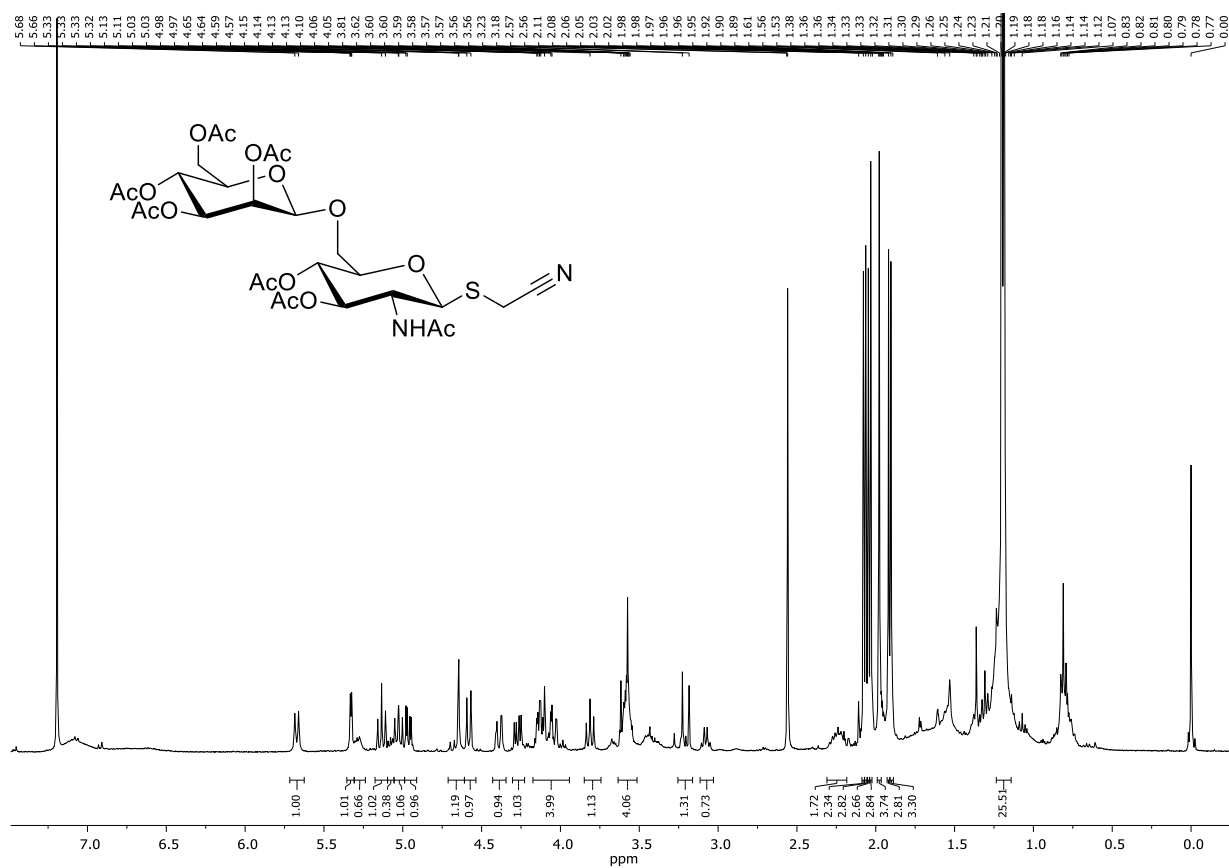

Figure S6.  $^1\text{H}$  NMR spectrum of 4d.



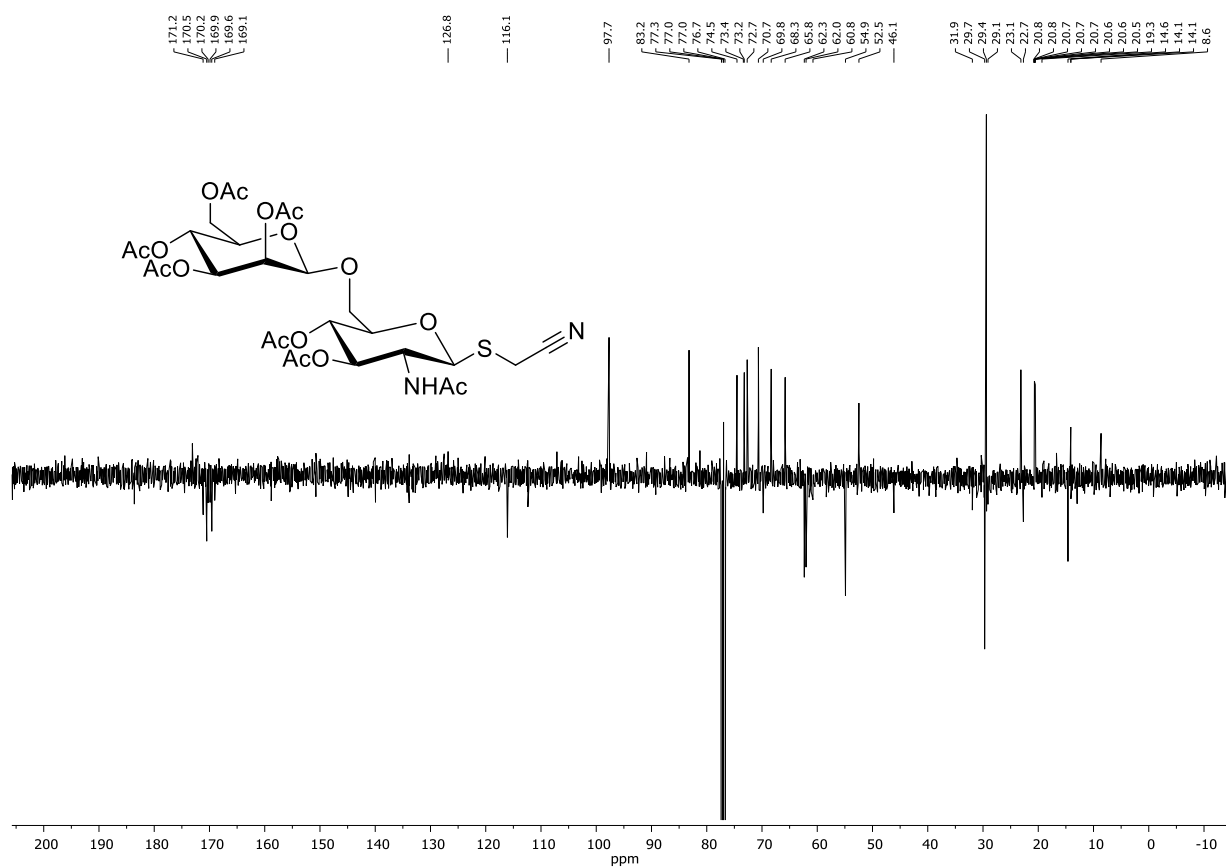

Figure S7.  $^{13}\text{C}$  NMR spectrum of **4d**.

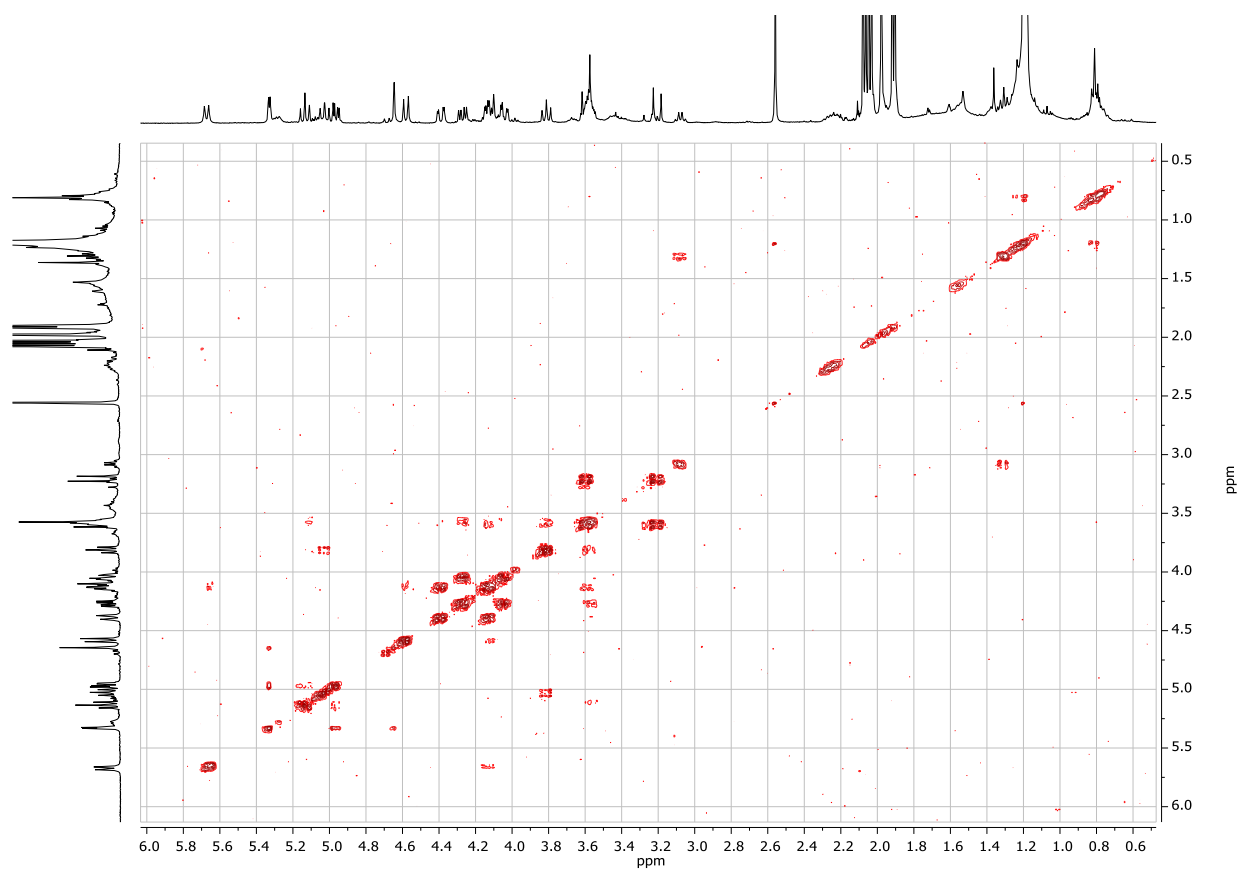

**Figure S8.** COSY spectrum of **4d**.

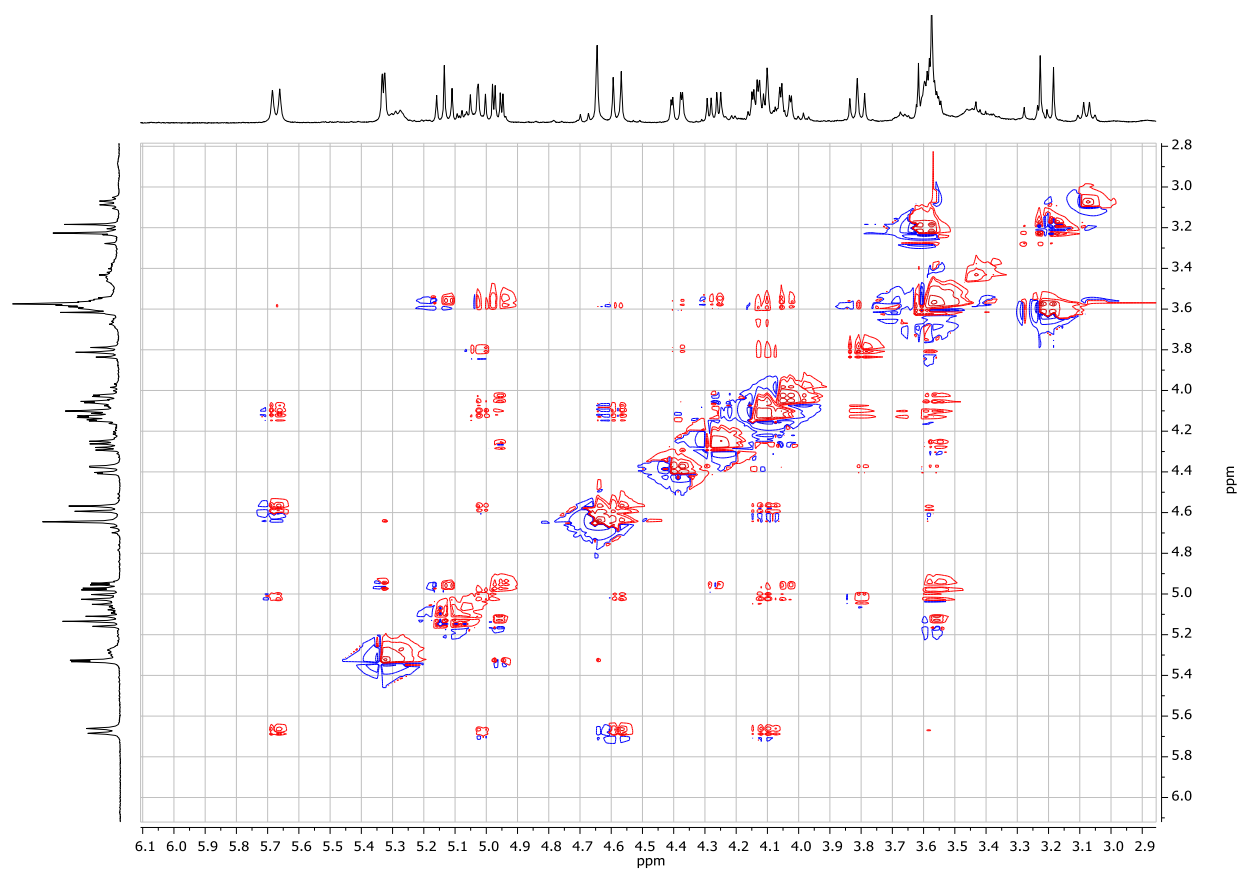

Figure S9. TOCSY spectrum of 4d.

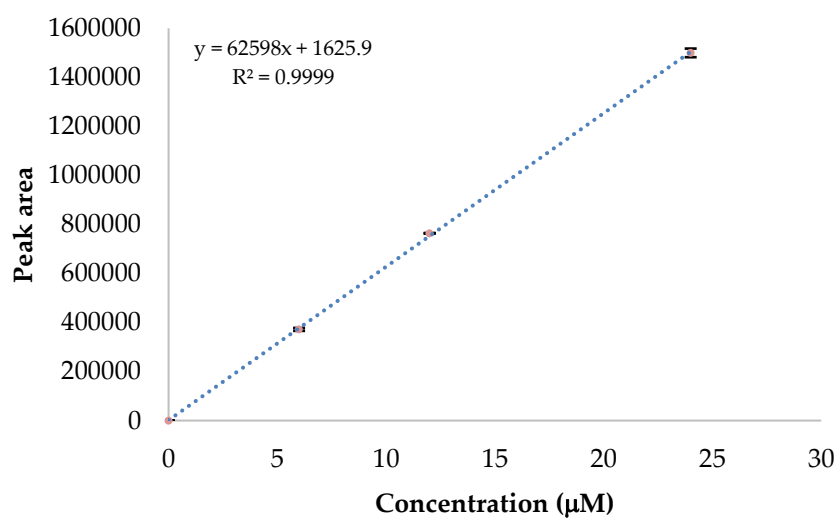

**Figure S10.** HPLC calibration curve of **4d**.

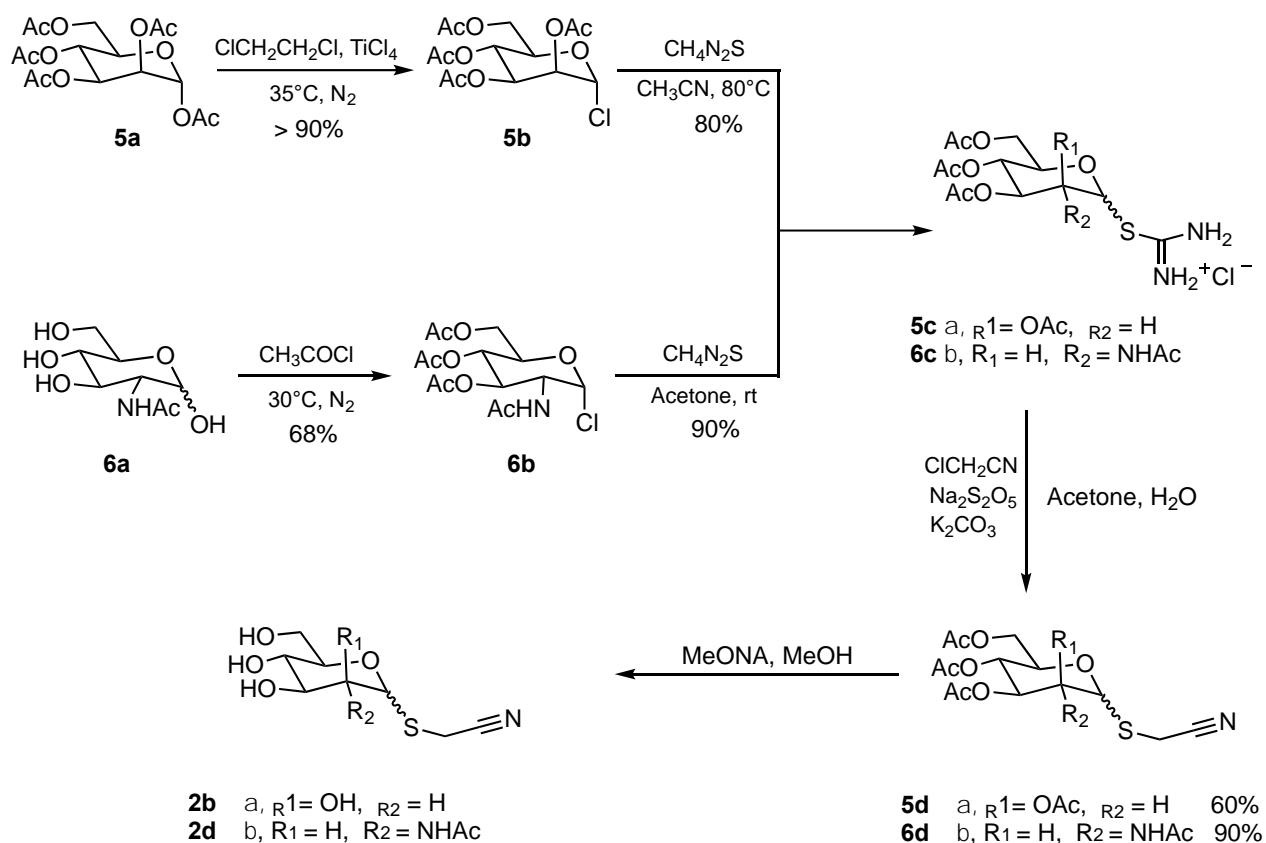

**Scheme S1.** Synthesis of cyanomethyl 1-thio- $\alpha$ -D-mannopyranoside (**2b**) and  $\beta$ -D-N-acetylglucosamine (**2d**).
